# Supplementary material for: Prevalence and predictors of no-shows to physical therapy for musculoskeletal conditions
Source: PubMed Central journal article supplement (PMC8162651; doi:10.1371/journal.pone.0251336), 2021-05-28
Supplement: pone.0251336.s001.pdf [file pone.0251336.s001.pdf]

|                                          | Dataset assignment    |                       |                   | P-value |
|------------------------------------------|-----------------------|-----------------------|-------------------|---------|
|                                          | Overall<br>N=444,995  | Training<br>N=333,747 | Test<br>N=111,248 |         |
| <b>Patient-level characteristics</b>     |                       |                       |                   |         |
| <b>Age (years)</b>                       |                       |                       |                   | 0.939   |
| Mean (min, max)                          | 53 (14, 117)          | 53 (14, 116)          | 53 (14, 117)      |         |
| Median (Q1, Q3)                          | 54 (39, 67)           | 54 (39, 67)           | 54 (39, 67)       |         |
| <b>Female</b>                            | 262906 (59.1%)        | 197233 (59.1%)        | 65673 (59.0%)     | 0.709   |
| <b>Pregnant</b>                          | 1749/262906<br>(0.7%) | 1306/197233 (0.7%)    | 443/65673 (0.7%)  | 0.735   |
| <b>Height (inches)</b>                   |                       |                       |                   | 0.306   |
| Mean (min, max)                          | 67 (36, 84)           | 67 (38, 84)           | 67 (36, 84)       |         |
| Median (Q1, Q3)                          | 66 (64, 70)           | 66 (64, 70)           | 66 (64, 70)       |         |
| <b>Weight (pounds)</b>                   |                       |                       |                   | 0.026   |
| Mean (min, max)                          | 182 (54, 400)         | 182 (57, 400)         | 182 (54, 400)     |         |
| Median (Q1, Q3)                          | 175 (149, 208)        | 175 (149, 208)        | 175 (150, 208)    |         |
| <b>BMI (kg/m<sup>2</sup>)</b>            |                       |                       |                   | 0.02    |
| Mean (min, max)                          | 29 (11, 75)           | 29 (11, 75)           | 29 (11, 71)       |         |
| Median (Q1, Q3)                          | 27 (24, 32)           | 27 (24, 32)           | 27 (24, 32)       |         |
| <b>Ever Smoker</b>                       | 65275 (14.7%)         | 48950 (14.7%)         | 16325 (14.7%)     | 0.95    |
| <b>Insurance provider</b>                |                       |                       |                   | 0.25    |
| Commercial                               | 257313 (57.8%)        | 193259 (57.9%)        | 64054 (57.6%)     |         |
| Medicaid                                 | 44894 (10.1%)         | 33555 (10.1%)         | 11339 (10.2%)     |         |
| Medicare                                 | 89760 (20.2%)         | 67299 (20.2%)         | 22461 (20.2%)     |         |
| Other                                    | 8437 (1.9%)           | 6326 (1.9%)           | 2111 (1.9%)       |         |
| Workers' Comp                            | 44591 (10.0%)         | 33308 (10.0%)         | 11283 (10.1%)     |         |
| <b>Therapist type</b>                    |                       |                       |                   | 0.02    |
| PT                                       | 436007 (98.0%)        | 327103 (98.0%)        | 108904 (97.9%)    |         |
| PTA                                      | 8988 (2.0%)           | 6644 (2.0%)           | 2344 (2.1%)       |         |
| <b>Number of providers at the clinic</b> |                       |                       |                   | 0.74    |
| Mean (min, max)                          | 2 (0, 15)             | 2 (0, 15)             | 2 (0, 15)         |         |

|                                 | Dataset assignment   |                       |                   | P-value |
|---------------------------------|----------------------|-----------------------|-------------------|---------|
|                                 | Overall<br>N=444,995 | Training<br>N=333,747 | Test<br>N=111,248 |         |
| Median (Q1, Q3)                 | 2 (1, 3)             | 2 (1, 3)              | 2 (1, 3)          |         |
| <b>Clinical characteristics</b> |                      |                       |                   |         |
| Primary body region             |                      |                       |                   | 0.61    |
| Elbow/Wrist/Hand                | 12900 (2.9%)         | 9685 (2.9%)           | 3215 (2.9%)       |         |
| Foot/Ankle                      | 42263 (9.5%)         | 31663 (9.5%)          | 10600 (9.5%)      |         |
| General                         | 765 (0.2%)           | 583 (0.2%)            | 182 (0.2%)        |         |
| Hip                             | 32275 (7.3%)         | 24364 (7.3%)          | 7911 (7.1%)       |         |
| Knee                            | 85874 (19.3%)        | 64394 (19.3%)         | 21480 (19.3%)     |         |
| Lumbar/SI                       | 116298 (26.1%)       | 87148 (26.1%)         | 29150 (26.2%)     |         |
| Neck                            | 55397 (12.4%)        | 41525 (12.4%)         | 13872 (12.5%)     |         |
| Shoulder                        | 70144 (15.8%)        | 52521 (15.7%)         | 17623 (15.8%)     |         |
| Other                           | 29079 (6.5%)         | 21864 (6.6%)          | 7215 (6.5%)       |         |
| Chronic injury                  | 81354 (18.3%)        | 61023 (18.3%)         | 20331 (18.3%)     | 0.95    |
| <b>Comorbidities</b>            |                      |                       |                   |         |
| Arthritis                       | 165354 (37.2%)       | 124030 (37.2%)        | 41324 (37.1%)     | 0.92    |
| High blood pressure             | 145655 (32.7%)       | 109078 (32.7%)        | 36577 (32.9%)     | 0.23    |
| Breathing difficulties/ Asthma  | 65205 (14.7%)        | 48930 (14.7%)         | 16275 (14.6%)     | 0.80    |
| Diabetes                        | 57127 (12.8%)        | 42757 (12.8%)         | 14370 (12.9%)     | 0.36    |
| Heart condition                 | 47506 (10.7%)        | 35786 (10.7%)         | 11720 (10.5%)     | 0.08    |
| Osteoporosis                    | 39395 (8.9%)         | 29689 (8.9%)          | 9706 (8.7%)       | 0.08    |
| Cancer                          | 36491 (8.2%)         | 27302 (8.2%)          | 9189 (8.3%)       | 0.40    |
| Psychological condition         | 28134 (6.3%)         | 21097 (6.3%)          | 7037 (6.3%)       | 0.96    |
| Chest pain                      | 22093 (5.0%)         | 16635 (5.0%)          | 5458 (4.9%)       | 0.30    |
| Kidney condition                | 18458 (4.1%)         | 13860 (4.2%)          | 4598 (4.1%)       | 0.78    |
| Stroke                          | 14529 (3.3%)         | 10965 (3.3%)          | 3564 (3.2%)       | 0.18    |

|                                                          | Dataset assignment   |                       |                   | P-value |
|----------------------------------------------------------|----------------------|-----------------------|-------------------|---------|
|                                                          | Overall<br>N=444,995 | Training<br>N=333,747 | Test<br>N=111,248 |         |
| <b>Symptom reports</b>                                   |                      |                       |                   |         |
| Night sweats/night pain                                  | 71316 (16.0%)        | 53537 (16.0%)         | 17779 (16.0%)     | 0.64    |
| Ringing in your ears                                     | 60499 (13.6%)        | 45498 (13.6%)         | 15001 (13.5%)     | 0.21    |
| Fracture                                                 | 43073 (9.7%)         | 32220 (9.7%)          | 10853 (9.8%)      | 0.32    |
| Difficulty swallowing                                    | 14906 (3.3%)         | 11146 (3.3%)          | 3760 (3.4%)       | 0.52    |
| <b>Number of comorbidities</b>                           |                      |                       |                   | 0.71    |
| Mean (min, max)                                          | 1 (0, 11)            | 1 (0, 11)             | 1 (0, 11)         |         |
| Median (Q1, Q3)                                          | 1 (0, 2)             | 1 (0, 2)              | 1 (0, 2)          |         |
| <b>Number of symptoms reported</b>                       |                      |                       |                   | 0.78    |
| Mean (min, max)                                          | 0 (0, 4)             | 0 (0, 4)              | 0 (0, 4)          |         |
| Median (Q1, Q3)                                          | 0 (0, 1)             | 0 (0, 1)              | 0 (0, 1)          |         |
| <b>Visits</b>                                            |                      |                       |                   |         |
| <b>Number of visits during episode</b>                   |                      |                       |                   | 0.79    |
| Mean (min, max)                                          | 14 (1, 171)          | 14 (1, 171)           | 14 (1, 153)       |         |
| Median (Q1, Q3)                                          | 12 (7, 18)           | 11 (7, 18)            | 12 (7, 18)        |         |
| <b>Time between first and last evaluation, days</b>      |                      |                       |                   | 0.76    |
| Mean (min, max)                                          | 44 (0, 692)          | 44 (0, 692)           | 44 (0, 491)       |         |
| Median (Q1, Q3)                                          | 36 (23, 56)          | 36 (23, 56)           | 36 (23, 56)       |         |
| <b>Maximum time between two consecutive visits, days</b> |                      |                       |                   | 0.14    |
| Mean (min, max)                                          | 8 (0, 90)            | 8 (0, 90)             | 8 (0, 87)         |         |
| Median (Q1, Q3)                                          | 6 (5, 8)             | 6 (5, 8)              | 6 (5, 8)          |         |
