# Supplementary material for: Prevalence and predictors of no-shows to physical therapy for musculoskeletal conditions
Source: PubMed Central journal article supplement (PMC8162651; doi:10.1371/journal.pone.0251336), 2021-05-28
Supplement: pone.0251336.s002.pdf [file pone.0251336.s002.pdf]

|                                          | <b>Overall<br/>N=444,995</b> | <b>Age 14-17<br/>N=20,203</b> | <b>Age 18+<br/>N=424,792</b> | <b>P-value</b> |
|------------------------------------------|------------------------------|-------------------------------|------------------------------|----------------|
| <b>Patient-level characteristics</b>     |                              |                               |                              |                |
| <b>Age (years)</b>                       |                              |                               |                              | <.001          |
| Mean (min, max)                          | 53 (14, 117)                 | 16 (14, 18)                   | 54 (18, 117)                 |                |
| Median (Q1, Q3)                          | 54 (39, 67)                  | 16 (15, 17)                   | 56 (42, 67)                  |                |
| <b>Female</b>                            | 262906 (59.1%)               | 10722 (53.1%)                 | 252184 (59.4%)               | <.001          |
| <b>Pregnant</b>                          | 1749/262906 (0.7%)           | 7/10722 (0.1%)                | 1742/252184 (0.7%)           | <.001          |
| <b>Height (inches)</b>                   |                              |                               |                              | <.001          |
| Mean (min, max)                          | 67 (36, 84)                  | 67 (40, 83)                   | 67 (36, 84)                  |                |
| Median (Q1, Q3)                          | 66 (64, 70)                  | 67 (64, 70)                   | 66 (64, 70)                  |                |
| <b>Weight (pounds)</b>                   |                              |                               |                              | <.001          |
| Mean (min, max)                          | 182 (54, 400)                | 149 (61, 400)                 | 183 (54, 400)                |                |
| Median (Q1, Q3)                          | 175 (149, 208)               | 140 (125, 165)                | 178 (150, 210)               |                |
| <b>BMI (kg/m<sup>2</sup>)</b>            |                              |                               |                              | <.001          |
| Mean (min, max)                          | 29 (11, 75)                  | 23 (11, 61)                   | 29 (11, 75)                  |                |
| Median (Q1, Q3)                          | 27 (24, 32)                  | 22 (20, 25)                   | 28 (24, 32)                  |                |
| <b>Ever smoker</b>                       | 65275 (14.7%)                | 193 (1.0%)                    | 65082 (15.3%)                | <.001          |
| <b>Insurance provider</b>                |                              |                               |                              | <.001          |
| Commercial                               | 257313 (57.8%)               | 15280 (75.6%)                 | 242033 (57.0%)               |                |
| Medicaid                                 | 44894 (10.1%)                | 3520 (17.4%)                  | 41374 (9.7%)                 |                |
| Medicare                                 | 89760 (20.2%)                | 1 (0.0%)                      | 89759 (21.1%)                |                |
| Other                                    | 8437 (1.9%)                  | 876 (4.3%)                    | 7561 (1.8%)                  |                |
| Workers' Comp                            | 44591 (10.0%)                | 526 (2.6%)                    | 44065 (10.4%)                |                |
| <b>Therapist type</b>                    |                              |                               |                              | 0.36           |
| PT                                       | 436007 (98.0%)               | 19813 (98.1%)                 | 416194 (98.0%)               |                |
| PTA                                      | 8988 (2.0%)                  | 390 (1.9%)                    | 8598 (2.0%)                  |                |
| <b>Number of providers at the clinic</b> |                              |                               |                              | <.001          |
| Mean (min, max)                          | 2 (0, 15)                    | 3 (0, 15)                     | 2 (0, 15)                    |                |
| Median (Q1, Q3)                          | 2 (1, 3)                     | 2 (1, 3)                      | 2 (1, 3)                     |                |
| <b>Clinical characteristics</b>          |                              |                               |                              |                |
| <b>Primary body region</b>               |                              |                               |                              | <.001          |
| Elbow/wrist/hand                         | 12900 (2.9%)                 | 710 (3.5%)                    | 12190 (2.9%)                 |                |

|                |                |              |                |       |
|----------------|----------------|--------------|----------------|-------|
| Foot/Ankle     | 42263 (9.5%)   | 3596 (17.8%) | 38667 (9.1%)   |       |
| General        | 765 (0.2%)     | 12 (0.1%)    | 753 (0.2%)     |       |
| Hip            | 32275 (7.3%)   | 1850 (9.2%)  | 30425 (7.2%)   |       |
| Knee           | 85874 (19.3%)  | 6394 (31.6%) | 79480 (18.7%)  |       |
| Lumbar/SI      | 116298 (26.1%) | 3499 (17.3%) | 112799 (26.6%) |       |
| Neck           | 55397 (12.4%)  | 1162 (5.8%)  | 54235 (12.8%)  |       |
| Shoulder       | 70144 (15.8%)  | 2464 (12.2%) | 67680 (15.9%)  |       |
| Other          | 29079 (6.5%)   | 516 (2.6%)   | 28563 (6.7%)   |       |
| Chronic injury | 81354 (18.3%)  | 2911 (14.4%) | 78443 (18.5%)  | <.001 |

---

### Comorbidities

---

|                               |                |              |                |       |
|-------------------------------|----------------|--------------|----------------|-------|
| Arthritis                     | 165354 (37.2%) | 186 (0.9%)   | 165168 (38.9%) | <.001 |
| High blood pressure           | 145655 (32.7%) | 126 (0.6%)   | 145529 (34.3%) | <.001 |
| Breathing difficulties/asthma | 65205 (14.7%)  | 2821 (14.0%) | 62384 (14.7%)  | 0.005 |
| Diabetes                      | 57127 (12.8%)  | 131 (0.6%)   | 56996 (13.4%)  | <.001 |
| Heart condition               | 47506 (10.7%)  | 234 (1.2%)   | 47272 (11.1%)  | <.001 |
| Osteoporosis                  | 39395 (8.9%)   | 21 (0.1%)    | 39374 (9.3%)   | <.001 |
| Cancer                        | 36491 (8.2%)   | 53 (0.3%)    | 36438 (8.6%)   | <.001 |
| Psychological condition       | 28134 (6.3%)   | 486 (2.4%)   | 27648 (6.5%)   | <.001 |
| Chest pain                    | 22093 (5.0%)   | 338 (1.7%)   | 21755 (5.1%)   | <.001 |
| Kidney condition              | 18458 (4.1%)   | 106 (0.5%)   | 18352 (4.3%)   | <.001 |
| Stroke                        | 14529 (3.3%)   | 20 (0.1%)    | 14509 (3.4%)   | <.001 |

---

### Symptom Reports

---

|                         |               |              |               |       |
|-------------------------|---------------|--------------|---------------|-------|
| Night sweats/night pain | 71316 (16.0%) | 444 (2.2%)   | 70872 (16.7%) | <.001 |
| Ringing in your ears    | 60499 (13.6%) | 475 (2.4%)   | 60024 (14.1%) | <.001 |
| Fracture                | 43073 (9.7%)  | 2283 (11.3%) | 40790 (9.6%)  | <.001 |
| Difficulty swallowing   | 14906 (3.3%)  | 103 (0.5%)   | 14803 (3.5%)  | <.001 |

### Number of comorbidities

|                 |           |          |           |       |
|-----------------|-----------|----------|-----------|-------|
| Mean (min, max) | 1 (0, 11) | 0 (0, 6) | 1 (0, 11) | <.001 |
| Median (Q1, Q3) | 1 (0, 2)  | 0 (0, 0) | 1 (0, 2)  |       |

### Number of symptoms reported

|                 |          |          |          |       |
|-----------------|----------|----------|----------|-------|
| Mean (min, max) | 0 (0, 4) | 0 (0, 4) | 0 (0, 4) | <.001 |
|-----------------|----------|----------|----------|-------|

|                                                   |             |             |             |       |
|---------------------------------------------------|-------------|-------------|-------------|-------|
| Median (Q1, Q3)                                   | 0 (0, 1)    | 0 (0, 0)    | 0 (0, 1)    |       |
| <hr/>                                             |             |             |             |       |
| <b>Visits</b>                                     |             |             |             |       |
| <hr/>                                             |             |             |             |       |
| Number of visits during episode                   |             |             |             | <.001 |
| Mean (min, max)                                   | 14 (1, 171) | 13 (1, 120) | 14 (1, 171) |       |
| Median (Q1, Q3)                                   | 12 (7, 18)  | 11 (7, 16)  | 12 (7, 18)  |       |
| Time between first and last evaluation, days      |             |             |             | 0.65  |
| Mean (min, max)                                   | 44 (0, 692) | 44 (0, 532) | 44 (0, 692) |       |
| Median (Q1, Q3)                                   | 36 (23, 56) | 35 (22, 54) | 36 (23, 56) |       |
| Maximum time between two consecutive visits, days |             |             |             | <.001 |
| Mean (min, max)                                   | 8 (0, 90)   | 8 (0, 86)   | 8 (0, 90)   |       |
| Median (Q1, Q3)                                   | 6 (5, 8)    | 7 (5, 9)    | 6 (5, 8)    |       |
| <hr/>                                             |             |             |             |       |
