# Supplementary material for: Prevalence and predictors of no-shows to physical therapy for musculoskeletal conditions
Source: PubMed Central journal article supplement (PMC8162651; doi:10.1371/journal.pone.0251336), 2021-05-28
Supplement: pone.0251336.s003.pdf [file pone.0251336.s003.pdf]

|                                          | <b>Excluded</b><br>N=112,346 | <b>Included</b><br>N=444,995 |
|------------------------------------------|------------------------------|------------------------------|
| <b>Patient Level Characteristics</b>     |                              |                              |
| <b>Age (years)</b>                       |                              |                              |
| Mean (min, max)                          | 45 (0, 104)                  | 53 (14, 117)                 |
| Median (Q1, Q3)                          | 48 (26, 62)                  | 54 (39, 67)                  |
| <b>Female</b>                            | 67205 (59.8%)                | 262906 (59.1%)               |
| <b>Pregnant</b>                          | 899/67205 (1.3%)             | 1749/262906 (0.7%)           |
| <b>Height (inche)</b>                    |                              |                              |
| Mean (min, max)                          | 61 (13, 720)                 | 67 (36, 84)                  |
| Median (Q1, Q3)                          | 62 (58, 65)                  | 66 (64, 70)                  |
| <b>Weight (pounds)</b>                   |                              |                              |
| Mean (min, max)                          | 121 (1, 972)                 | 182 (54, 400)                |
| Median (Q1, Q3)                          | 106 (85, 130)                | 175 (149, 208)               |
| <b>BMI (kg/m<sup>2</sup>)</b>            |                              |                              |
| Mean (min, max)                          | 22 (0, 308)                  | 29 (11, 75)                  |
| Median (Q1, Q3)                          | 20 (18, 23)                  | 27 (24, 32)                  |
| <b>Ever Smoker</b>                       | 11766 (10.5%)                | 65275 (14.7%)                |
| <b>Insurance provider</b>                |                              |                              |
| Commercial                               | 71552 (63.7%)                | 257313 (57.8%)               |
| Medicaid                                 | 12293 (10.9%)                | 44894 (10.1%)                |
| Medicare                                 | 15569 (13.9%)                | 89760 (20.2%)                |
| Other                                    | 2977 (2.6%)                  | 8437 (1.9%)                  |
| Workers' Comp                            | 9955 (8.9%)                  | 44591 (10.0%)                |
| <b>Therapist type</b>                    |                              |                              |
| PT                                       | 109447 (97.4%)               | 436007 (98.0%)               |
| PTA                                      | 2899 (2.6%)                  | 8988 (2.0%)                  |
| <b>Number of Providers at the Clinic</b> |                              |                              |
| Mean (min, max)                          | 3 (0, 15)                    | 2 (0, 15)                    |
| Median (Q1, Q3)                          | 2 (1, 3)                     | 2 (1, 3)                     |

|                                 |               |                |
|---------------------------------|---------------|----------------|
| <b>Clinical Characteristics</b> |               |                |
| <b>Primary body region</b>      |               |                |
| Elbow/Wrist/Hand                | 5033 (4.5%)   | 12900 (2.9%)   |
| Foot/Ankle                      | 13896 (12.4%) | 42263 (9.5%)   |
| General                         | 8454 (7.5%)   | 765 (0.2%)     |
| Hip                             | 8354 (7.4%)   | 32275 (7.3%)   |
| Knee                            | 23612 (21.0%) | 85874 (19.3%)  |
| Lumbar/SI                       | 21437 (19.1%) | 116298 (26.1%) |
| Neck                            | 10820 (9.6%)  | 55397 (12.4%)  |
| Other                           | 5843 (5.2%)   | 29079 (6.5%)   |
| Shoulder                        | 14897 (13.3%) | 70144 (15.8%)  |
| Chronic injury                  | 23421 (20.8%) | 81354 (18.3%)  |

---

**Comorbidities**

---

|                                |               |                |
|--------------------------------|---------------|----------------|
| Arthritis                      | 29828 (26.6%) | 165354 (37.2%) |
| High blood pressure            | 26093 (23.2%) | 145655 (32.7%) |
| Breathing difficulties/ Asthma | 14266 (12.7%) | 65205 (14.7%)  |
| Diabetes                       | 10290 (9.2%)  | 57127 (12.8%)  |
| Heart condition                | 8775 (7.8%)   | 47506 (10.7%)  |
| Osteoporosis                   | 6882 (6.1%)   | 39395 (8.9%)   |
| Cancer                         | 6516 (5.8%)   | 36491 (8.2%)   |
| Psychological condition        | 5822 (5.2%)   | 28134 (6.3%)   |
| Chest pain                     | 4101 (3.7%)   | 22093 (5.0%)   |
| Kidney condition               | 3367 (3.0%)   | 18458 (4.1%)   |
| Stroke                         | 2568 (2.3%)   | 14529 (3.3%)   |

---

**Symptom Reports**

---

|                          |               |               |
|--------------------------|---------------|---------------|
| Night sweats/ Night pain | 13018 (11.6%) | 71316 (16.0%) |
| Ringing in your ears     | 11132 (9.9%)  | 60499 (13.6%) |
| Fracture                 | 10496 (9.3%)  | 43073 (9.7%)  |
| Difficulty swallowing    | 2738 (2.4%)   | 14906 (3.3%)  |

---

**Number of comorbidities**

---

|                 |           |           |
|-----------------|-----------|-----------|
| Mean (min, max) | 1 (0, 11) | 1 (0, 11) |
| Median (Q1, Q3) | 0 (0, 2)  | 1 (0, 2)  |

**Number of symptoms reported**

|                 |          |          |
|-----------------|----------|----------|
| Mean (min, max) | 0 (0, 4) | 0 (0, 4) |
| Median (Q1, Q3) | 0 (0, 1) | 0 (0, 1) |

---

**Visits**

---

**Number of visits during episode**

|                 |             |             |
|-----------------|-------------|-------------|
| Mean (min, max) | 13 (1, 193) | 14 (1, 171) |
| Median (Q1, Q3) | 10 (6, 16)  | 12 (7, 18)  |

**Time between first and last evaluation, days**

|                 |             |             |
|-----------------|-------------|-------------|
| Mean (min, max) | 43 (0, 644) | 44 (0, 692) |
| Median (Q1, Q3) | 35 (20, 56) | 36 (23, 56) |

**Maximum time between two consecutive visits, days**

|                 |           |           |
|-----------------|-----------|-----------|
| Mean (min, max) | 8 (0, 90) | 8 (0, 90) |
| Median (Q1, Q3) | 6 (5, 9)  | 6 (5, 8)  |
